# Supplementary material
Source: PubMed Central journal article supplement (PMC5900348)
Supplement: ncomms7186-s1.pdf [file ncomms7186-s1.pdf]

A.

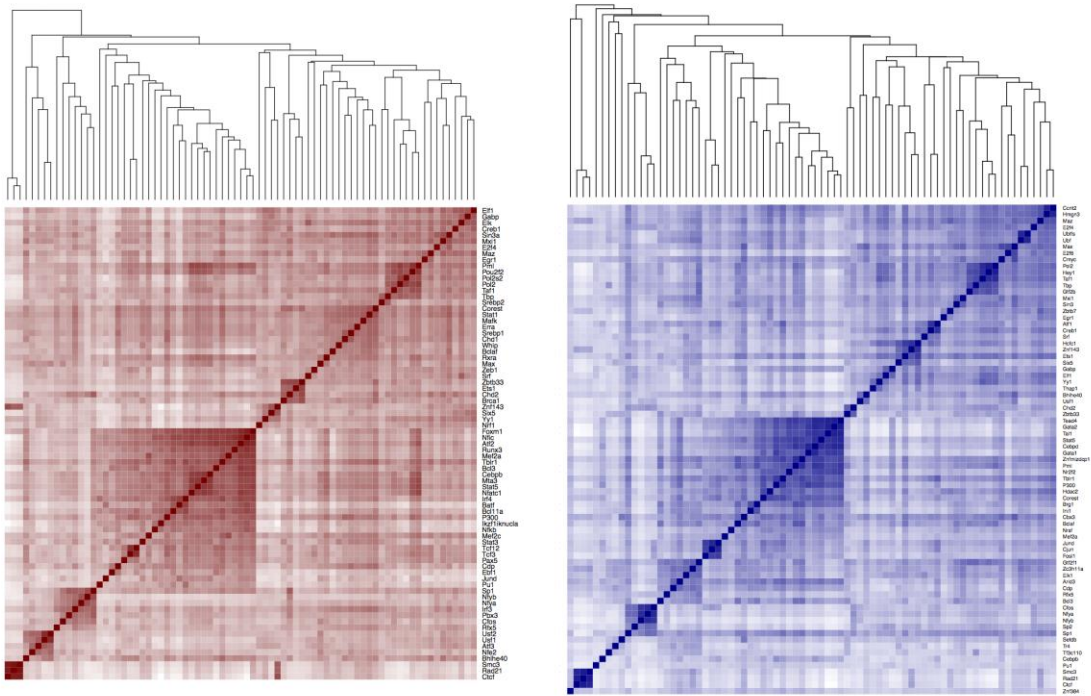

B.

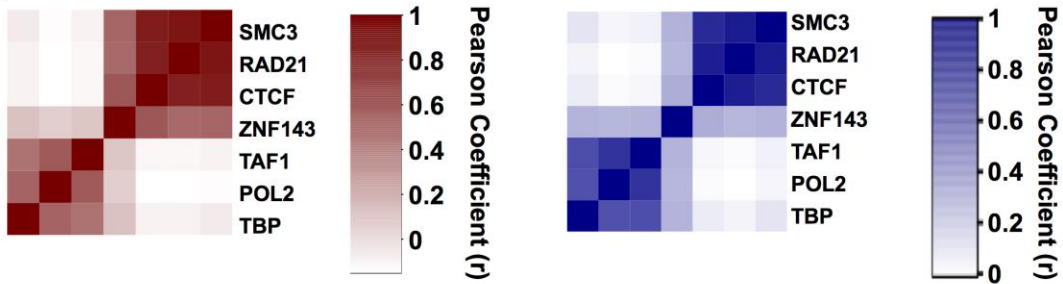

**Supplementary Figure 1: ZNF143 bridges promoter factors with CTCF and cohesin.**

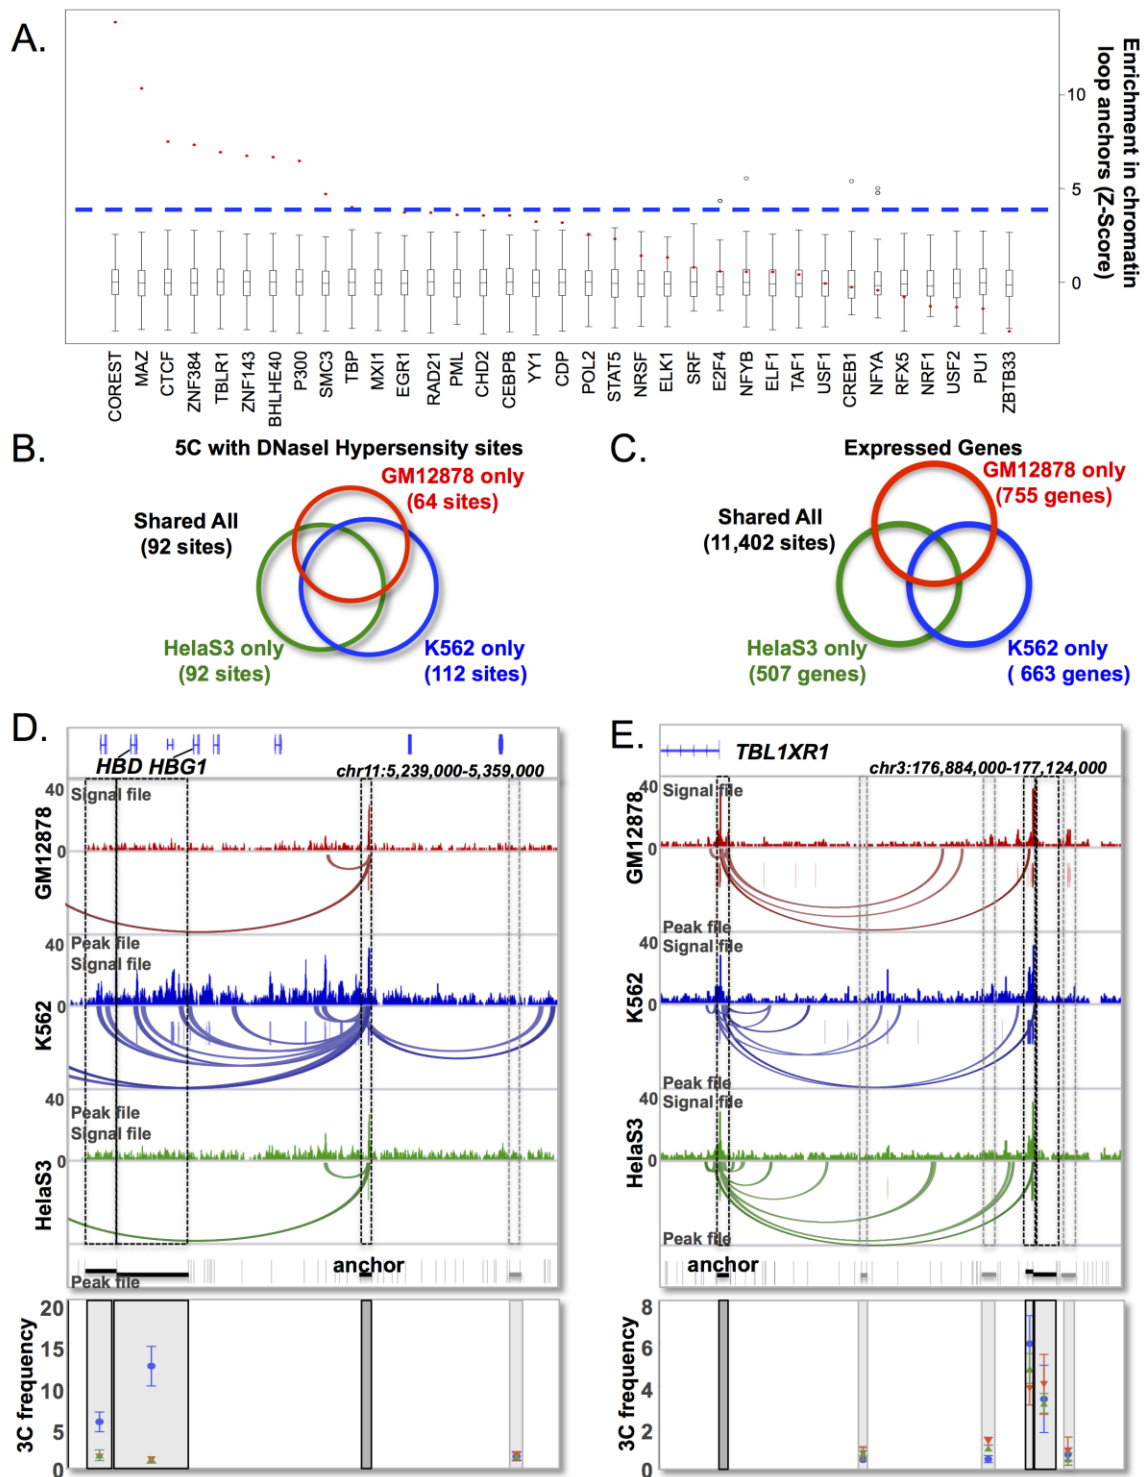

**Supplementary Figure 2: ZNF143 is enriched within the anchors of chromatin interactions and displays cell type-specificity.** Black boxes and bars indicate the anchor and test regions. Grey boxes and bars indicate control regions.

rs2232015

rs13228237

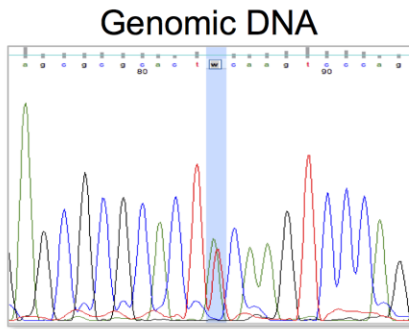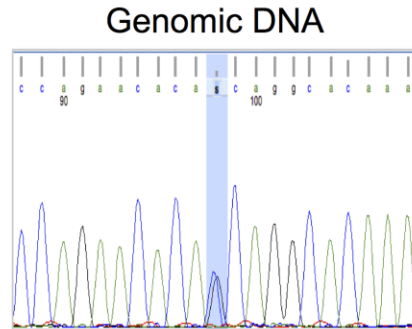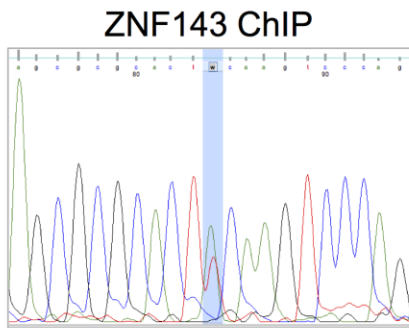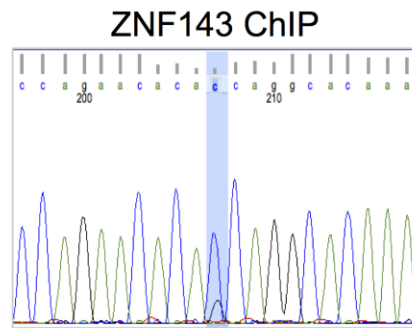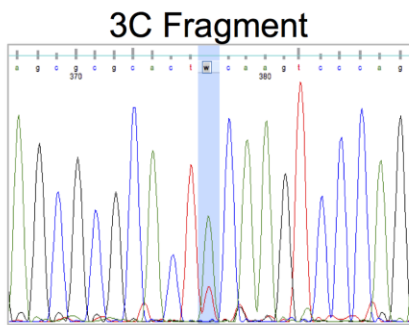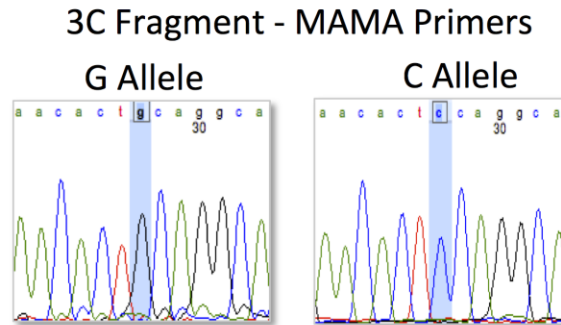

**Supplementary Figure 3: SNPs causing allele-specific ZNF143 binding lead to allele-specific changes in the frequency of chromatin interactions**

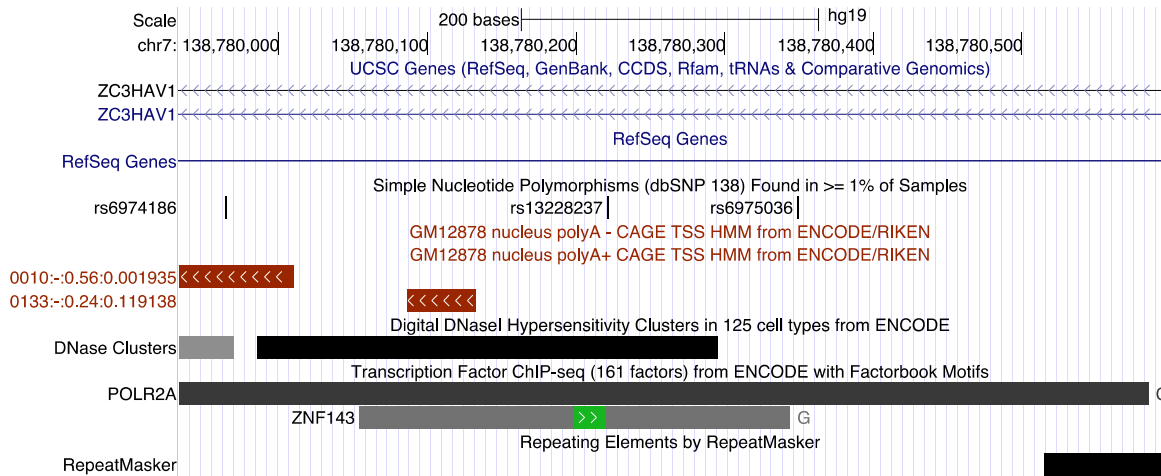

**Supplementary Figure 4: The ZNF143 binding site modulated by the rs13228327 SNP at the *ZC3HAV1* gene locus and may represent an unknown isoform of *ZC3HAV1* gene.**

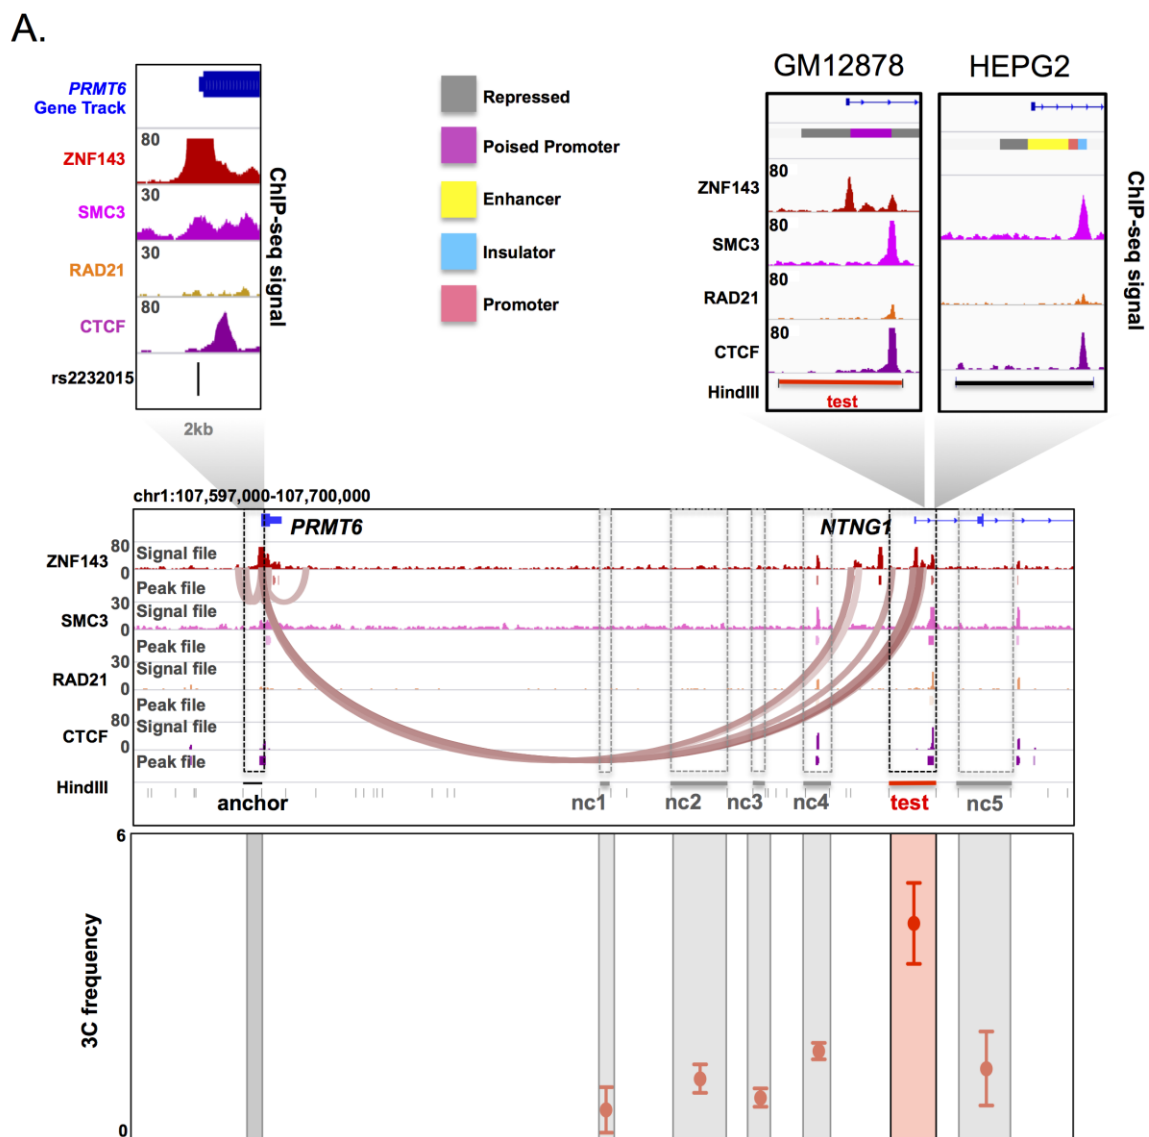

**Supplementary Figure 5a: The *PRMT6* locus displays allele-specific ZNF143 binding to the chromatin leading and a change in the frequency of a distal chromatin interaction. Test (red) is the test region. nc1-5 (grey) are the negative control regions.**

B.

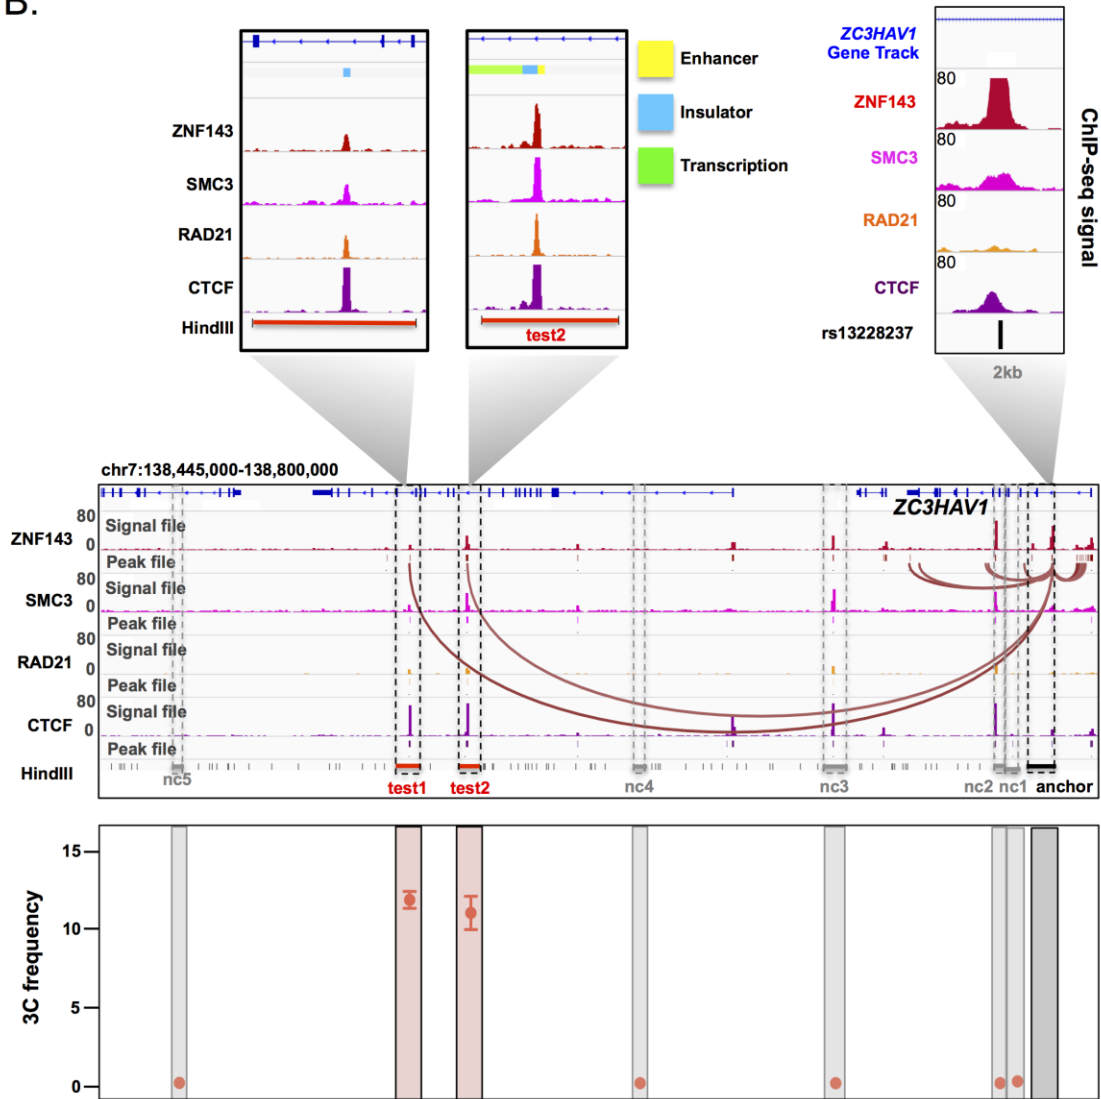

**Supplementary Figure 5b: The *ZC3HAV1* locus displays allele-specific ZNF143 binding to the chromatin leading to a change in the frequency of distal chromatin interactions.** Test (red) is the test region. nc1-5 (grey) are the negative control regions.

| Cell name | GEO accession number | Platform | Protocol                       |
|-----------|----------------------|----------|--------------------------------|
| GM12878   | GSM591661/GSM591673  | Illumina | Paired-end non-specific        |
| GM12878   | GSM591664/GSM591669  | Illumina | Strand-specific not paired end |
| GM12878   | GSM958728/GSM958728  | Illumina | Paired-end non-specific        |
| GM12878   | GSM958730/GSM958730  | Illumina | Strand-specific not paired-end |
| HeLaS3    | GSM591670/GSM591671  | Illumina | Strand-specific not paired-end |
| HeLaS3    | GSM591682/GSM591659  | Illumina | Paired-end non-specific        |
| HeLaS3    | GSM765402/GSM765402  | Illumina | Paired-end non-specific        |
| HeLaS3    | GSM767848/GSM767848  | Illumina | Paired-end non-specific        |
| K562      | GSM883635/GSM672833  | Illumina | Paired-end non-specific        |
| K562      | GSM591666/GSM591668  | Illumina | Paired-end non-specific        |
| K562      | GSM591679/GSM591660  | Illumina | Strand-specific not paired-end |
| K562      | GSM958729/GSM958729  | Illumina | Paired-end non-specific        |

**Supplementary Table 1 : List of RNA-seq experiments for the GM12878, K562 and HeLaS3 cell lines.** The Gene Expression Omnibus (GEO) accession number, the sequencing platform and the protocol used to measure the gene expression levels are listed.

**3C**

|       |                       |                                   |
|-------|-----------------------|-----------------------------------|
| 3C_01 | CACCAGGGGTGAAGAGTTTT  | <i>TBLIXR1</i> anchor             |
| 3C_02 | GCCTTCTCTTACAGCCAAATG | nc1                               |
| 3C_03 | TGATGGGACTTGCAGTTTGA  | nc2                               |
| 3C_04 | CCTGTTGAGCCCAGAGAGAT  | test1                             |
| 3C_05 | CCCGCTCCTCTGATGTTTAC  | test2                             |
| 3C_06 | GCAGGTTTCCATTCTTACACC | nc3                               |
| 3C_07 | CCAAATGGGTGACTGTAGGG  | <i>HBB</i> region enhancer anchor |
| 3C_08 | AGGGCGCAGGCTTATTATTT  | <i>HBD</i>                        |
| 3C_09 | TGGTTATGGTCAGAGCCTCA  | <i>HBB</i>                        |
| 3C_10 | TTCAAGTTCCTGGCACTCAC  | nc                                |
| 3C_11 | TCAACATGACCCCTTTTAGGA | <i>EEF1A1</i> anchor              |
| 3C_12 | GTTTAGTGTGCAGGGCCAAT  | nc1                               |
| 3C_13 | GATCCCTGCTGTGAGTGGTT  | test                              |
| 3C_14 | CTTTTGGCTCATCCCCTTT   | nc2                               |
| 3C_15 | GCAGGAAGTAGGAAGGACGA  | <i>PRMT6</i> anchor               |
| 3C_16 | CGTCTTCCACACTTCAACCA  | nc1                               |
| 3C_17 | TGGGCTAAAACCACAACCTC  | nc2                               |
| 3C_18 | AGGGGCAAAGTCTTGTGAGA  | nc3                               |
| 3C_19 | GTTGGGTCCTTGCAAAAGAG  | nc4                               |
| 3C_20 | TAAACCTCCAGCAAGCCCTA  | test                              |
| 3C_21 | TTGTCAATGGGGAAGAATCTG | nc5                               |
| Int_F | TGGGTGGTGTTCATCTGGTAA | Internal control                  |
| Int_R | GGATGGAATGGATCAGATGG  |                                   |

**ChIP**

|         |                      |                         |
|---------|----------------------|-------------------------|
| ChIP_01 | GGAGAGGAATTGAGGCAGAA | <i>TBLIXR1</i> promoter |
| ChIP_02 | GTTGAGTGTCTGAGCCGTTG |                         |
| ChIP_03 | CGCTCCTCTGCTCAGTCATT | <i>TBLIXR1</i> enhancer |
| ChIP_04 | CCGGAGTGCTCCTCTCTTAG |                         |
| ChIP_05 | CACGGCGACTACTGCACTTA | <i>EEF1A1</i> promoter  |
| ChIP_06 | AACCGGTGCCTAGAGAAGGT |                         |
| ChIP_07 | TTTTGCCTAGTGTCCCTGCT | <i>EEF1A1</i> enhancer  |
| ChIP_08 | GCGAACAATGGAAAGTCACA |                         |

**RT PCR**

|       |                       |                 |
|-------|-----------------------|-----------------|
| RT_01 | CGATCCATCATCCGCAATG   | <i>28S rRNA</i> |
| RT_02 | AGCCAAGCTCAGCGCAAC    |                 |
| RT_03 | CGCAGTCTGACACCATCTTG  | <i>ZNF143</i>   |
| RT_04 | CCAATCATTCCAGTACCTGCT |                 |
| RT_05 | ACCCGCTGCATTGATTTCTA  | <i>TBLIXR1</i>  |
| RT_06 | ACGGCATCTATCAGGGACAG  |                 |
| RT_07 | ACTGGGATGTGCATGTTGAA  | <i>EEF1A1</i>   |
| RT_08 | TGGACCCTTCCACTCATAGG  |                 |

**MAMA**

|             |                                      |           |
|-------------|--------------------------------------|-----------|
| rs2232015_F | <a href="#">ATGCCAGGACACCAGAAGAG</a> | rs2232015 |
| rs2232015_R | CCCCGACTCAAGCTTTCCTT                 |           |
| Forward_A   | GAAGGACGAGCGCGCAC <b>AA</b>          |           |
| Forward_T   | GAAGGACGAGCGCGCAC <b>AT</b>          |           |
| Reverse_A   | CGGGGGCTTCTGGGACTT <b>AT</b>         |           |
| Reverse_T   | CGGGGGCTTCTGGGACTT <b>AA</b>         |           |

**Supplementary Table 2:** Primers used in this study.
